# Supplementary material for: miR-29b Mediates the Chronic Inflammatory Response in Radiotherapy-Induced Vascular Disease
Source: PubMed Central journal article supplement — JACC Basic Transl Sci. 2019 Feb 25;4(1):72–82. doi: 10.1016/j.jacbts.2018.10.006 (PMC6390501; doi:10.1016/j.jacbts.2018.10.006), 2019-02-25
Supplement: mmc1.pdf [file mmc1.pdf]

## SUPPLEMENTAL MATERIAL

Suzanne M. Eken MD, PhD<sup>1</sup>, Tinna Christersdottir MD<sup>2</sup>, Greg Winski MD<sup>1</sup>, Traimate Sangsuwan MSc<sup>3</sup>, Hong Jin MD, PhD<sup>1</sup>, Ekaterina Chernogubova PhD<sup>1</sup>, John Pirault PhD<sup>4</sup>, Changyan Sun MSc<sup>1</sup>, Nancy Simon MSc<sup>1</sup>, Hanna Winter MSc<sup>5</sup>, Alexandra Backlund PhD<sup>1</sup>, Siamak Haghdooost PhD<sup>3,6</sup>, Göran K. Hansson MD PhD<sup>1</sup>, Martin Halle MD, PhD<sup>2,7\*</sup>, Lars Maegdefessel MD, PhD<sup>1,5\*</sup>

<sup>1</sup>Cardiovascular Medicine Unit, Department of Medicine Solna, Karolinska Institute, Stockholm, Sweden. <sup>2</sup>Department of Molecular Medicine and Surgery, Karolinska Institute, Stockholm, Sweden. <sup>3</sup>Department of Molecular Biosciences, Wenner-Gren Institute, Stockholms University, Stockholm, Sweden. <sup>4</sup>INSERM UMR\_S1116, Université de Lorraine, Vandoeuvre-lès-Nancy, France. <sup>5</sup>Technical University Munich, Department of Vascular and Endovascular Surgery, Munich, Germany and German Center for Cardiovascular Research (DZHK) partner site Munich. <sup>6</sup>University of Caen Normandie, LARIA – CIMAP, Caen, France. <sup>7</sup>Department of Reconstructive Plastic Surgery, Karolinska University Hospital, Stockholm, Sweden.

\* Both authors contributed equally.

## **ONLINE METHODS**

### **Animal experiments**

During the observation period, mice received water and food *ad libitum*. Mice were sacrificed in the acute phase (14 days) after irradiation through CO<sub>2</sub> inhalation, exsanguinated by heart puncture and perfused with 4°C cold phosphate-buffered saline. Organs were snap frozen in dry ice-containing ethanol and stored at -80°C. Vascular tissue from the irradiated area (carotid arteries, thoracic aorta, and aortic arch) was embedded in Optimal Cutting Temperature (OCT) Cryomount compound (Histolab, Gothenburg, Sweden), snap frozen and stored at -80°C.

### **RNA isolation and cDNA synthesis**

Cells were lysed in 700 µL QIAzol/well (Qiagen, Hilden, Germany), scraped off cell culture plates with a cell scraper, and homogenized by pipetting up and down. Tissues were lysed in 700 µL QIAzol/tissue unit using mechanical homogenization. RNA was extracted using the Qiagen miRNeasy Mini (standard) or Micro (mouse carotid tissue and cells from 12-well plates) Kit according to the manufacturer's protocol (Qiagen). Total RNA concentration was assessed using a NanoDrop 2000 spectrophotometer (Thermo Fisher Scientific). All RNA extracted from human tissue was tested for quality with a Bioanalyzer instrument (Agilent Technologies, Santa Clara, CA, USA). For miRNA analysis, total RNA was diluted in RNase-free water to a concentration of 2 ng/µL. Five µL (10 ng) was used for miRNA complementary cDNA (cDNA) synthesis using the Taqman MicroRNA Reverse Transcription Kit with reverse transcriptase primers for the selected miRNAs (Online Table 1, all Thermo Fisher Scientific). For mRNA analysis, we used 300 or 1000 ng (100-200 ng for mouse carotid arteries) of total RNA for cDNA synthesis using the Taqman High Capacity cDNA Transcription Kit with random primers.

### **Soluble collagen assay**

Cell supernatant was aspirated and stored at -80°C. Soluble collagen was measured with a soluble collagen assay kit (2BScientific, Oxfordshire, United Kingdom) according to the manufacturer's instructions.

### **Western blotting**

Cells were washed with cold PBS (4°C), and lysed with RIPA cocktail containing RIPA lysis and extraction buffer, phosphatase- and protease inhibitors, EDTA and sodium azide (all Sigma-Aldrich, St. Louis, MO, USA). The cell lysate was aspirated and centrifuged at 14,000 rpm for 10 minutes, at 4°C. The supernatant was used for protein analysis. Protein concentrations were determined using the Bicinchoninic Acid assay (Thermo Fisher Scientific, Waltham, MA, USA). Protein samples were loaded on 12% Tris-Glycine gels (Thermo Fisher Scientific). Following electrophoresis and electrotransfer, the PVDF membrane (Bio-Rad, Hercules, CA, USA) was blocked with 5% bovine serum albumin before primary antibody incubation (detailed online table S4). After secondary antibody incubation, horseradish peroxidase activity was detected with an enhanced chemiluminescence (ECL) kit (Thermo Fisher Scientific) and analyzed using ImageJ software version 1.6.0\_65.

### **Immunohistochemistry**

We used standard biotin-streptavidin-horseradish peroxidase methods. Briefly, sections were de-paraffinized and endogenous peroxidase activity blocked in 0.3% hydrogen peroxide. For VCAM1 staining, heat-induced antigen retrieval was performed using Diva Decloaker (Biocare Medical, Concord, CA, USA). Sections were blocked for 1 hour with 1% goat normal serum (Vector Laboratories, Burlingame, CA, USA), and incubated with the primary antibody (all from Abcam, Cambridge, UK; See Online Table 4) overnight at 4°C. After secondary antibody incubation, slides were stained using the ABC Elite Kit (Vector Laboratories) followed by aminoethyl carbazole (AEC, Nichirei Biosciences, Tokyo, Japan) incubation. Nuclei were counterstained with hematoxylin (Sigma Aldrich, St. Louis, MO, USA).

### **Immunocytochemistry**

For immunocytochemistry (ICC), cells were grown on UV-sterilized glass coverslips in 12 well plates. Cells were washed three times with cold (4°C) PBS, fixed in 4% paraformaldehyde for 10 minutes at room temperature (RT), and permeabilized by incubation with 0.2% Triton-X100 in PBS. After blocking in 3% bovine serum albumin, cells were incubated with the first antibody (anti-Caspase 3 or anti-Ki-67, both Abcam, Cambridge, UK, details see Online Table 4) at 4°C overnight. Antibodies were detected with subsequent fluorescent secondary antibodies (Alexa Fluor 488 or 594, Thermo Fisher Scientific), counterstained with Hoechst 33258 (Thermo Fisher Scientific, 1:10,000), and mounted. Cells were photographed using fluorescence microscopy on a confocal microscope (Leica SP5, Jena, Germany) equipped with a 40 × 1.4 lens and diode and argon lasers. Caspase-3 or Ki-67 positive cells were counted in six different, randomly chosen fields for each group.

**Online Table 1. miRNA sequences, references, and corresponding Taqman assay ID**

| Name     | Mature miRNA sequence   | Reference | Assay ID |
|----------|-------------------------|-----------|----------|
| miR-29b  | UAGCACCAUUUGAAAUCAGUGUU | [1]       | 000413   |
| miR-125a | UCCCUGAGACCCUUAACCUGUGA | [2]       | 002198   |
| miR-126  | UCGUACCGUGAGUAAUAAUGCG  | [3]       | 002228   |
| miR-143  | UGAGAUGAAGCACUGUAGCUC   | [4]       | 002249   |
| miR-145  | GUCCAGUUUCCCAGGAAUCCCU  | [4]       | 002278   |
| miR-146a | UGAGAACUGAAUCCAUGGGUU   | [4, 5]    | 000468   |
| miR-146b | UGAGAACUGAAUCCAUAGGCU   | [4]       | 001097   |
| miR-155  | UUA AUGCUAAUCGUGAUAGGGU | [5]       | 002623   |
| miR-221  | AGCUACAUUGUCUGCGGGUUUC  | [6, 7]    | 000524   |
| miR-222  | AGCUACAUCUGGCUACUGGGU   | [6, 7]    | 002276   |
| miR-503  | UAGCAGCGGGAACAGUUCUGCAG | [8]       | 001048   |

**Online Table 2. Small RNA normalization control sequences and Taqman assay ID**

| Name       | Sequence                                                                                                           | Assay ID |
|------------|--------------------------------------------------------------------------------------------------------------------|----------|
| cel-miR-39 | UCACCGGGUGUAAAUCAGCUUG                                                                                             | 000200   |
| U6 snRNA   | GTGCTCGCTTCGGCAGCACATATACTAAAATTGGAACG<br>ATACAGAGAAGATTAGCATGGCCCCTGCGCAAGGATG<br>ACACGCAAATTCGTGAAGCGTTCCATATTTT | 001973   |
| RNU48      | GATGACCCAGGTA ACTCTGAGTGTGTCGCTGATGCCA<br>TCACCGCAGCGCTCTGACC                                                      | 001006   |
| sno202     | GCTGTACTGACTTGATGAAAGTACTTTTGAACCCTTTTC<br>CATCTGATG                                                               | 001232   |

**Online Table 3. Genes and Taqman assay ID**

| Name                   | NCBI reference sequence | Assay ID      |
|------------------------|-------------------------|---------------|
| <i>B4GALT5</i> , human | NM_004776.3             | Hs00408932_cn |
| <i>COL1A1</i> , human  | NM_000088.3             | Hs01076749_g1 |
| <i>DPP4</i> , human    | NM_001935               | Hs00897391_m1 |
| <i>PTX3</i> , human    | NM_002852.3             | Hs00173615_m1 |
| <i>RPLP0</i> , human   | NM_001002.3             | Hs02992885_s1 |
| <i>Actb</i> , mouse    | NM_007393.5             | Mm02619580_g1 |
| <i>Ptx3</i> , mouse    | NM_008987.3             | Mm00477268_m1 |

**Online Table 4. Abcam antibodies**

| Name | Catalog no. | Dilution               | Secondary antibody dilution  |
|------|-------------|------------------------|------------------------------|
| DPP4 | ab114033    | 1:500 (WB); 1:50 (IHC) | 1:80,000 (WB); 1:200 (IHC)   |
| KI67 | ab15580     | 1:50 (ICC)             | 1:200 (ICC)                  |
| Mac2 | ab53082     | 1:100 (IHC)            | 1:200 (IHC)                  |
| PTX3 | ab90806     | 1:50 (WB, IHC)         | 1:10,000 (WB); 1:1,000 (IHC) |
| SMA  | ab5694      | 1:100 (IHC)            | 1:200 (IHC)                  |

ICC, immunocytochemistry. IHC, immunohistochemistry. WB, Western blotting.

## References

1. Maegdefessel, L., et al., *Inhibition of microRNA-29b reduces murine abdominal aortic aneurysm development*. J Clin Invest, 2012. **122**(2): p. 497-506.
2. Nazari-Jahantigh, M., Y. Wei, and A. Schober, *The role of microRNAs in arterial remodelling*. Thromb Haemost, 2012. **107**(4): p. 611-8.
3. Jansen, F., et al., *Endothelial microparticle-mediated transfer of MicroRNA-126 promotes vascular endothelial cell repair via SPRED1 and is abrogated in glucose-damaged endothelial microparticles*. Circulation, 2013. **128**(18): p. 2026-38.
4. Zampetaki, A. and M. Mayr, *MicroRNAs in vascular and metabolic disease*. Circ Res, 2012. **110**(3): p. 508-22.
5. Eigsti, R.L., et al., *Regulation of activation-associated microRNA accumulation rates during monocyte-to-macrophage differentiation*. J Biol Chem, 2014. **289**(41): p. 28433-47.
6. Leung, A., et al., *Novel long noncoding RNAs are regulated by angiotensin II in vascular smooth muscle cells*. Circ Res, 2013. **113**(3): p. 266-78.
7. Mackenzie, N.C., et al., *miRNA-221 and miRNA-222 synergistically function to promote vascular calcification*. Cell Biochem Funct, 2014. **32**(2): p. 209-16.
8. Caporali, A., et al., *Deregulation of microRNA-503 contributes to diabetes mellitus-induced impairment of endothelial function and reparative angiogenesis after limb ischemia*. Circulation, 2011. **123**(3): p. 282-91.

# Online Figure 1.

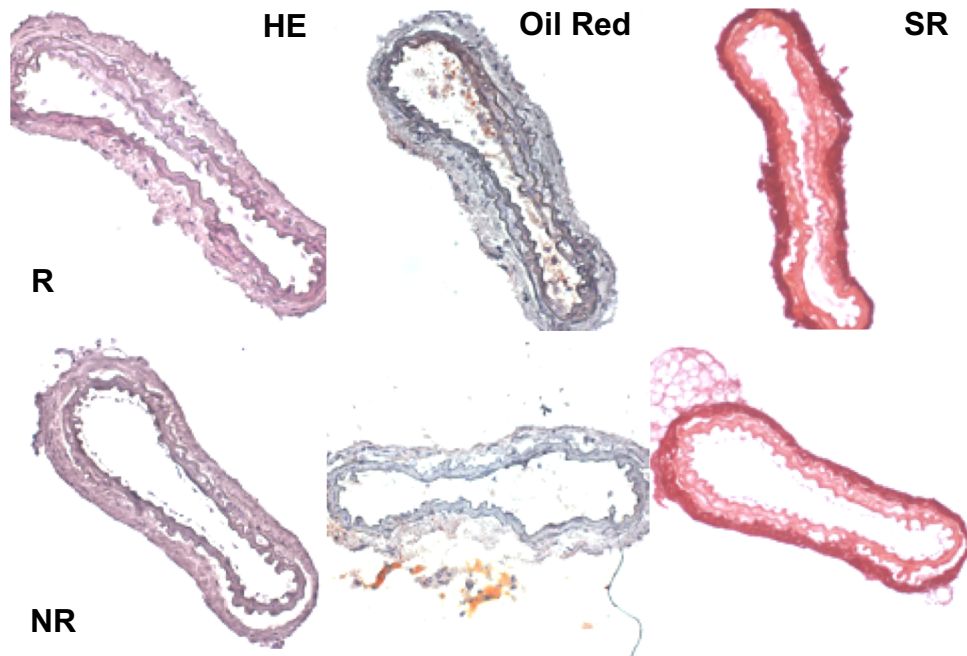

No apparent histological changes were observed in carotid arteries 10 weeks after irradiation. HE, hematoxylin and eosin; Oil Red, Oil Red O; SR, Sirius Red.



Online Figure 2.

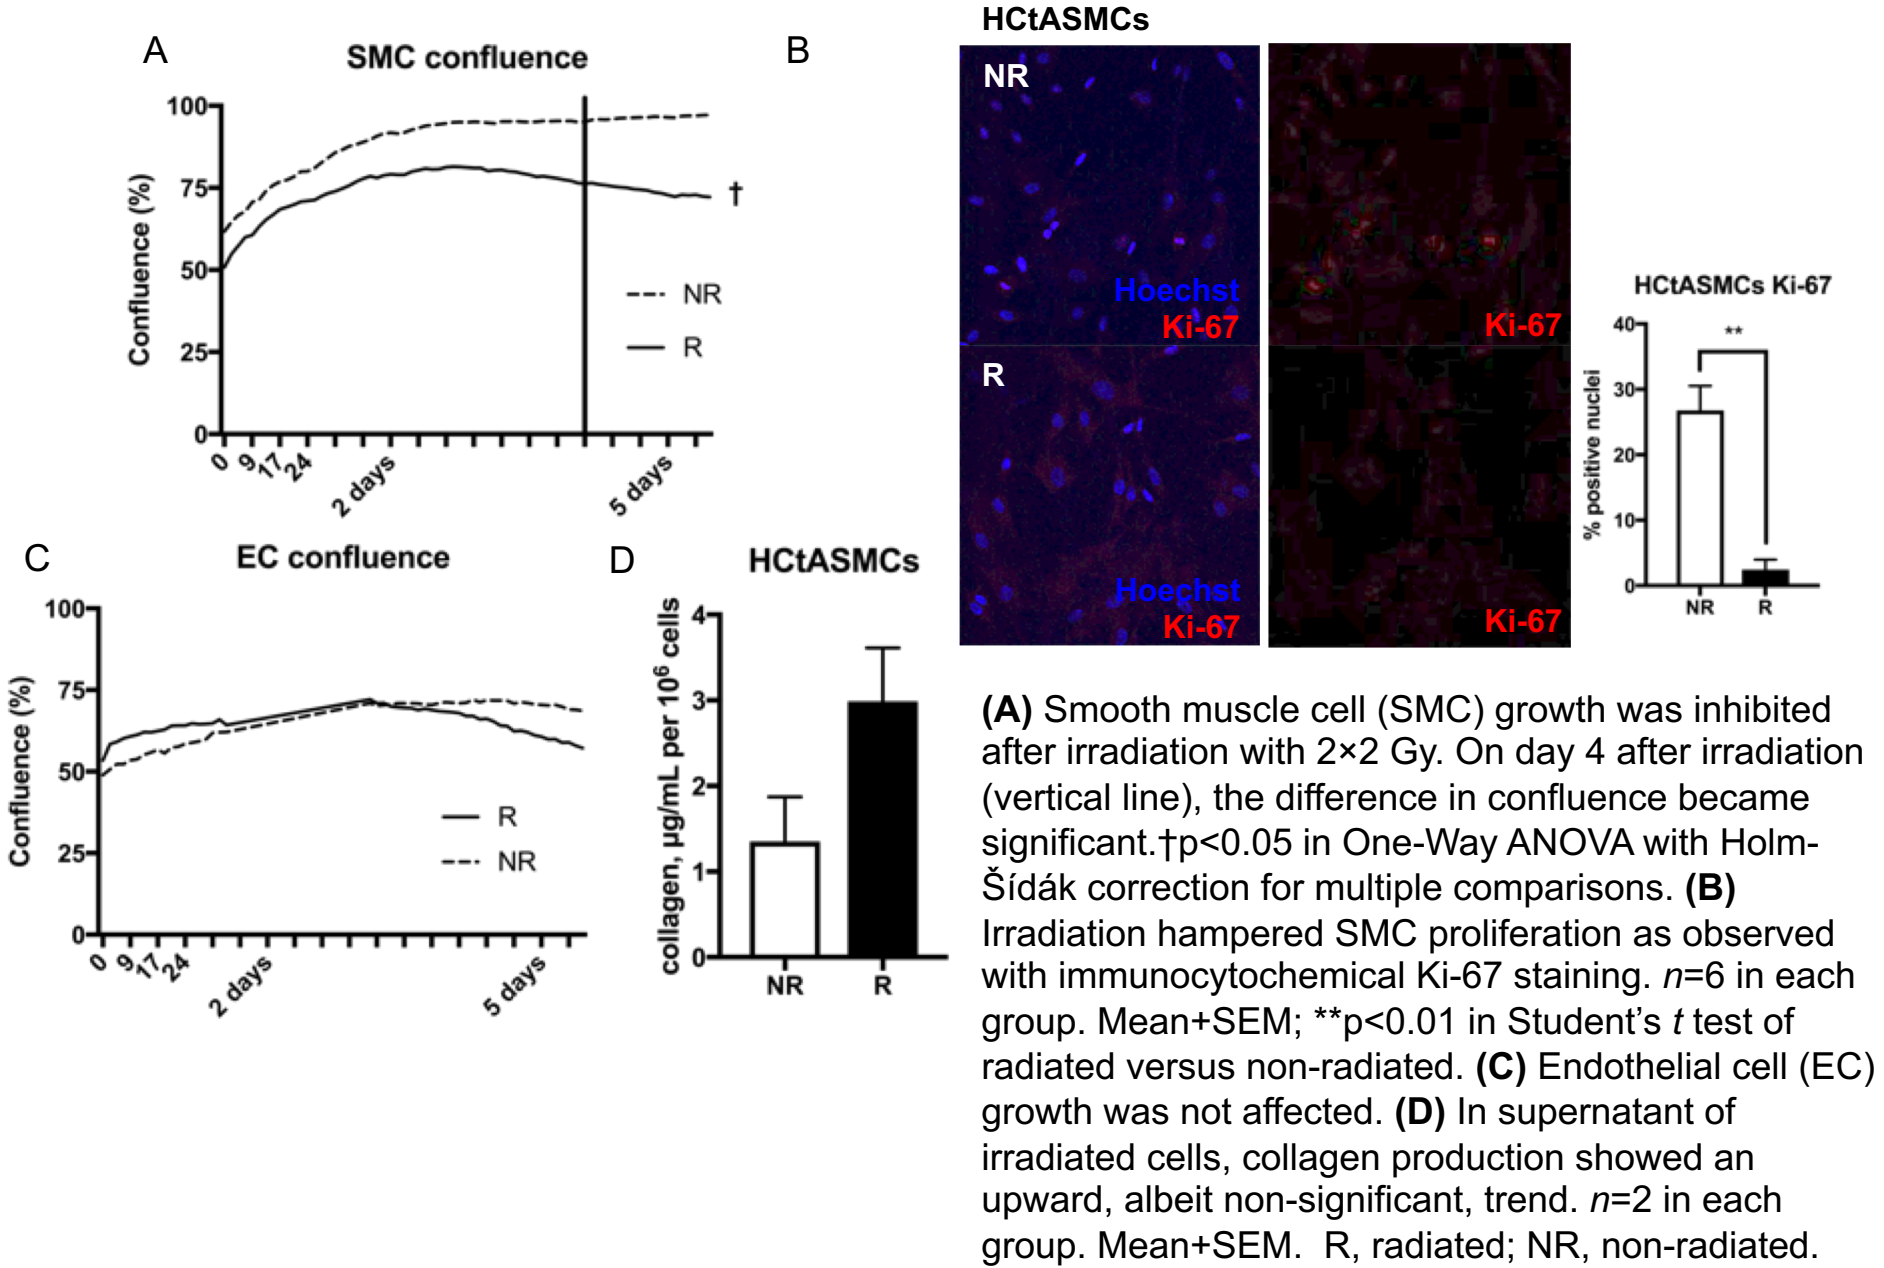

# Online Figure 3.

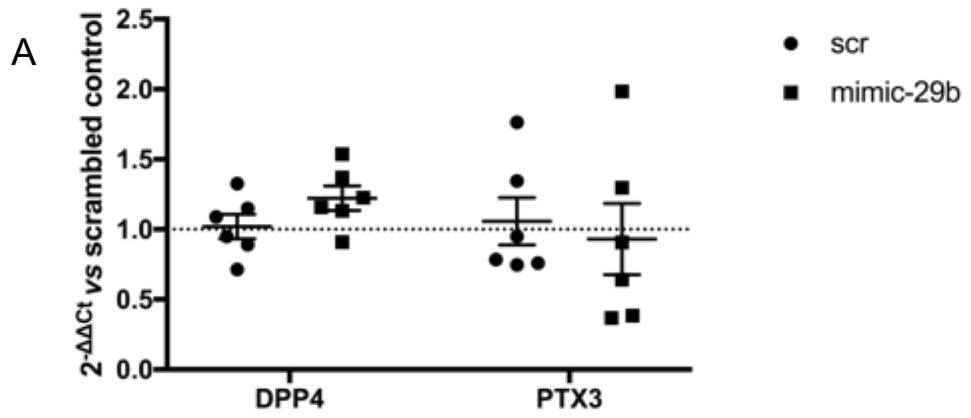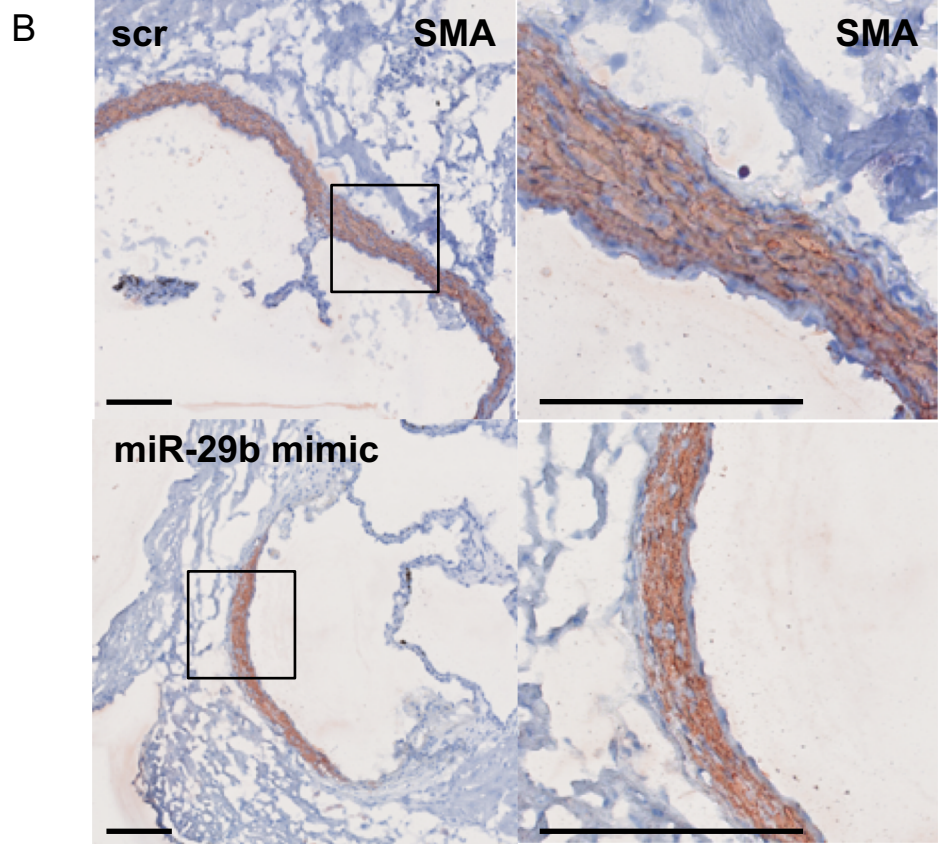

**(A)** Dpp4 and Ptx3 gene expression was not significantly affected by miR-29 mimic treatment. **(B)** Smooth muscle actin (SMA) staining of aortic rings from irradiated mice receiving scrambled control (scr) or miR-29b mimics. Bars, 200 μm.
